# Supplementary material for: The prognostic value of tumor length to resectable esophageal squamous cell carcinoma: a retrospective study
Source: PeerJ. 2017 Jan 31;5:e2943. doi: 10.7717/peerj.2943 (PMC5289103; doi:10.7717/peerj.2943)
Supplement: Data S1 [file peerj-05-2943-s002.xlsx]

## Sheet: Supplemental Raw data S2
Sex	ABO blood group	Length of smoking time (year)	Length of alcohol drinking time (year)	Family history in first degree relatives with any cancer	Types of esophageal resection	T	N	M	Tumor size	Histological types	Margin	Survival time(month)	Grade	Status
Male	B	20	20	None	Ivor-Lewis	3	3	0	×cm	ESCC	Negative	6	Moderately	1
Female	A	0	0	None	Ivor-Lewis	1b	0	0	0.6×0.3cm	ESCC	Negative	70.1	Moderately	0
Male	AB	30	30	None	Ivor-Lewis	1a	0	0	0.8×0.1cm	ESCC	Negative	2.9	Moderately	0
Female	B	0	0	None	Ivor-Lewis	1a	0	0	1.5×0.2cm	ESCC	Negative	59	Moderately	0
Male	O	30	30	Father&esophagus cancer	Ivor-Lewis	3	0	0	1.8×1.5cm	ESCC	Negative	74.6	Well	0
Male	A	30	30	None	Ivor-Lewis	2	0	0	1×0.2cm	ESCC	Negative	17.5	Moderately	1
Male	A	0	0	None	Ivor-Lewis	1b	0	0	1×0.3cm	ESCC	Negative	70.3	Moderately	1
Male	B	20	20	None	Ivor-Lewis	1a	0	0	2.2×0.2cm	ESCC	Negative	2	Moderately	0
Male	A	30	30	None	Ivor-Lewis	3	0	0	2.3×1cm	ESCC	Negative	17.6	Moderately	1
Male	A	10	0	None	Ivor-Lewis	2	0	0	2.4×0.9cm	ESCC	Negative	15	Moderately	1
Female	AB	0	0	None	Ivor-Lewis	2	0	0	2.5×0.4cm	ESCC	Negative	73.3	Moderately	0
Male	AB	37	36	None	Ivor-Lewis	2a	0	0	2.5×0.5cm	ESCC	Negative	28.3	Moderately	1
Male	AB	30	10	Mother&esophagus cancer	Ivor-Lewis	3	0	0	2.5×0.8cm	ESCC	Negative	13.4	Poorly	0
Male	O	30	0	Mother&esophagus cancer	Ivor-Lewis	2a	0	0	2.5×0.8cm	ESCC	Negative	1.7	Moderately	0
Female	AB	0	0	None	Ivor-Lewis	2	0	0	2.5×0.8cm	ESCC	Negative	41	Moderately	0
Female	O	15	0	None	Ivor-Lewis	2a	0	0	2.5×1.2cm	ESCC	Negative	69	Moderately	0
Female	B	0	0	Father&liver cancer	Ivor-Lewis	2b	0	0	2.5×1.2cm	ESCC	Negative	1.3	Poorly	0
Male	B	30	5	None	Ivor-Lewis	3	0	0	2.5×1.3cm	ESCC	Negative	63.3	Moderately	0
Female	A	0	0	None	Ivor-Lewis	3	0	0	2.5×1.4cm	ESCC	Negative	11.9	Moderately	0
Male	AB	25	25	None	Ivor-Lewis	3	0	0	2.5×1.5cm	ESCC	Negative	16.8	Moderately	1
Male	B	30	10	Mother&esophagus cancer	Ivor-Lewis	3	1	0	2.5×1cm	ESCC	Negative	1.6	Moderately	0
Female	O	0	0	None	Ivor-Lewis	3	0	0	2.5×1cm	ESCC	Negative	1.2	Poorly	0
Female	O	0	0	None	Ivor-Lewis	3	2	0	2×0.5cm	ESCC	Negative	4.1	Unknown	0
Male	B	0	0	None	Ivor-Lewis	3	0	0	2×0.7cm	ESCC	Negative	1.1	Moderately	0
Female	A	0	0	None	Ivor-Lewis	2b	2	0	2×0.7cm	ESCC	Negative	12.9	Undifferentiated	1
Female	B	0	0	None	Ivor-Lewis	2a	1	0	2×0.8cm	ESCC	Negative	1.4	Poorly	0
Male	AB	30	20	None	Ivor-Lewis	3	1	0	2×0.8cm	ESCC	Negative	5	Poorly	0
Male	A	40	40	None	Ivor-Lewis	2b	0	0	2×1.5cm	ESCC	Negative	36.2	Moderately	1
Male	B	0	0	None	Ivor-Lewis	3	1	0	2×1cm	ESCC	Negative	2	Moderately	0
Male	AB	10	15	None	Ivor-Lewis	2	0	0	2×1cm	ESCC	Negative	72.1	Moderately	0
Male	B	0	0	Father&liver cancer	Ivor-Lewis	3	0	0	2×2cm	ESCC	Negative	57.2	Moderately	0
Female	O	8	0	None	Ivor-Lewis	2	2	0	3.2×1.3cm	ESCC	Negative	22	Moderately	1
Female	O	0	0	None	Ivor-Lewis	3	0	0	3.3×1.3cm	ESCC	Negative	24.1	Moderately	1
Female	A	30	30	None	Ivor-Lewis	2a	0	0	3.5×0.3cm	ESCC	Negative	56.9	Moderately	0
Female	A	0	0	None	Ivor-Lewis	2	0	0	3.5×0.6cm	ESCC	Negative	41.2	Moderately	1
Male	O	25	25	None	Ivor-Lewis	3	1	0	3.5×0.6cm	ESCC	Negative	6.7	Moderately	1
Female	A	0	0	None	Ivor-Lewis	3	2	0	3.5×0.7cm	ESCC	Negative	17.5	Moderately	1
Female	O	0	0	None	Ivor-Lewis	3	0	0	3.5×1.2cm	ESCC	Negative	65.9	Moderately	0
Female	Unkonwn	0	0	None	Ivor-Lewis	3	1	0	3.5×1.5cm	ESCC	Negative	12.3	Moderately	1
Female	A	0	0	None	Ivor-Lewis	3	0	0	3.5×1.7cm	ESCC	Negative	36.2	Moderately	1
Male	A	40	0	None	Ivor-Lewis	3	2	0	3.5×2.5cm	ESCC	Negative	32	Poorly	1
Male	O	0	0	Father&esophagus cancer	Ivor-Lewis	2	1	0	3.6×2cm	ESCC	Negative	11.2	Moderately	1
Male	A	36	22	None	Ivor-Lewis	1b	0	0	3.8×1cm	ESCC	Negative	56.4	Moderately	0
Male	Unkonwn	50	20	None	Ivor-Lewis	3	0	0	3×0.2cm	ESCC	Negative	54.4	Moderately	1
Male	A	30	25	None	Ivor-Lewis	1b	0	0	3×0.5cm	ESCC	Negative	71	Well	0
Female	B	8	0	None	Ivor-Lewis	1b	0	0	3×0.5cm	ESCC	Negative	48.5	Moderately	1
Male	O	10	30	None	Ivor-Lewis	3	0	0	3×0.5cm	ESCC	Negative	26.2	Unknown	1
Male	O	0	20	None	Ivor-Lewis	2a	0	0	3×0.5cm	ESCC	Negative	43.5	Poorly	1
Male	O	30	40	None	Ivor-Lewis	3	0	0	3×0.6cm	ESCC	Negative	4.3	Moderately	0
Male	Unkonwn	0	0	None	Ivor-Lewis	2b	0	0	3×0.7cm	ESCC	Negative	47.2	Moderately	1
Male	AB	0	0	Father&lung cancer	Ivor-Lewis	3	0	0	3×0.8cm	ESCC	Negative	5.2	Moderately	0
Female	B	0	0	None	Ivor-Lewis	2a	0	0	3×0.8cm	ESCC	Negative	55.6	Moderately	0
Male	A	40	40	None	Ivor-Lewis	3	0	0	3×1.5cm	ESCC	Negative	62.6	Poorly	0
Male	B	20	0	None	Ivor-Lewis	3	0	0	3×1.8cm	ESCC	Negative	54.7	Moderately	0
Male	A	30	30	None	Ivor-Lewis	3	2	0	3×1cm	ESCC	Negative	4.3	Poorly	0
Male	O	20	30	None	Ivor-Lewis	3	0	0	3×1cm	ESCC	Negative	31.1	Moderately	1
Male	Unkonwn	25	20	None	Ivor-Lewis	2b	1	0	3×1cm	ESCC	Negative	32.7	Moderately	1
Male	A	40	34	None	Ivor-Lewis	3	1	0	3×1cm	ESCC	Negative	44.1	Moderately	1
Male	A	30	0	None	Ivor-Lewis	3	0	0	3×2cm	ESCC	Negative	62.2	Moderately	0
Male	O	22	0	Father&stomach cancer	Ivor-Lewis	2	0	0	3×2cm	ESCC	Negative	65.2	Moderately	0
Male	Unkonwn	20	30	Mother&esophagus cancer	Ivor-Lewis	3	0	0	3×2cm	ESCC	Negative	50.9	Moderately	1
Female	O	30	20	None	Ivor-Lewis	2	0	0	3×2cm	ESCC	Negative	70.2	Moderately	0
Male	Unkonwn	30	40	None	Ivor-Lewis	1b	0	0	3×3cm	ESCC	Negative	54.7	Moderately	0
Male	B	20	20	None	Ivor-Lewis	2	0	0	4.5×0.7cm	ESCC	Negative	74.6	Moderately	0
Female	A	0	0	Father&esophagus cancer	Ivor-Lewis	2a	0	0	4.5×0.8cm	ESCC	Negative	1.1	Moderately	0
Male	A	20	20	None	Ivor-Lewis	3	2	0	4.5×1.2cm	ESCC	Negative	6.4	Moderately	0
Male	AB	30	0	None	Ivor-Lewis	3	1	0	4.5×1.5cm	ESCC	Negative	59.2	Unknown	0
Male	B	0	0	None	Ivor-Lewis	3	2	0	4.5×1.5cm	ESCC	Negative	1.9	Poorly	0
Male	AB	42	20	None	Ivor-Lewis	3	1	0	4.5×1.5cm	ESCC	Negative	16.8	Moderately	1
Male	A	0	0	None	Ivor-Lewis	3	2	0	4.5×1cm	ESCC	Negative	6	Moderately	0
Male	B	30	30	None	Ivor-Lewis	2b	1	0	4.5×1cm	ESCC	Negative	2.9	Poorly	0
Male	O	40	40	None	Ivor-Lewis	2	0	0	4×0.5cm	ESCC	Negative	45	Moderately	1
Female	A	10	0	None	Ivor-Lewis	1a	1	0	4×0.8cm	ESCC	Negative	7.5	Poorly	0
Male	B	40	40	None	Ivor-Lewis	4	0	0	4×0.8cm	ESCC	Negative	0.3	Moderately	0
Male	AB	20	10	Mother&nasopharynx cancer	Ivor-Lewis	3	1	0	4×0.8cm	ESCC	Negative	17.1	Moderately	1
Male	O	50	50	None	Ivor-Lewis	2b	0	0	4×1.2cm	ESCC	Negative	57.3	Moderately	0
Male	B	30	20	None	Ivor-Lewis	2b	0	0	4×1.2cm	ESCC	Negative	71.1	Moderately	0
Male	O	0	40	None	Ivor-Lewis	3	2	0	4×1.3cm	ESCC	Negative	16.5	Poorly	1
Male	A	20	20	None	Ivor-Lewis	3	0	0	4×1.4cm	ESCC	Negative	60.7	Moderately	0
Male	AB	40	40	None	Ivor-Lewis	3	0	0	4×1.5cm	ESCC	Negative	67.3	Unknown	1
Male	A	0	0	None	Ivor-Lewis	3	2	0	4×1.5cm	ESCC	Negative	5.5	Moderately	1
Female	B	0	0	None	Ivor-Lewis	3	1	0	4×1.6cm	ESCC	Negative	41.5	Moderately	1
Male	O	20	0	None	Ivor-Lewis	3	2	0	4×1.8cm	ESCC	Negative	62.8	Moderately	1
Male	A	30	30	Father&esophagus cancer	Ivor-Lewis	3	2	0	4×1cm	ESCC	Negative	4.8	Poorly	0
Male	AB	10	0	None	Ivor-Lewis	2a	0	0	4×1cm	ESCC	Negative	6.8	Moderately	0
Male	A	30	30	Father&esophagus cancer	Ivor-Lewis	3	0	0	4×1cm	ESCC	Negative	7.1	Moderately	0
Female	O	0	0	None	Ivor-Lewis	3	1	0	4×1cm	ESCC	Negative	45.1	Moderately	1
Male	A	26	0	None	Ivor-Lewis	3	1	0	4×1cm	ESCC	Negative	48.6	Moderately	1
Female	AB	0	0	None	Ivor-Lewis	3	0	0	4×2cm	ESCC	Negative	4	Moderately	0
Male	Unkonwn	20	20	None	Ivor-Lewis	3	0	0	4×2cm	ESCC	Negative	8.9	Moderately	1
Male	A	25	25	None	Ivor-Lewis	2a	0	0	4×2cm	ESCC	Negative	17.5	Moderately	1
Female	B	0	0	None	Ivor-Lewis	3	1	0	4×3cm	ESCC	Negative	9.2	Moderately	0
Male	O	0	30	None	Ivor-Lewis	3	0	0	5.2×1.3cm	ESCC	Negative	22.6	Moderately	1
Male	O	0	20	None	Ivor-Lewis	4	0	0	5.5×1.5cm	ESCC	Negative	1	Moderately	0
Female	A	2	0	None	Ivor-Lewis	3	0	0	5.5×1.5cm	ESCC	Negative	37.7	Moderately	1
Male	A	0	0	None	Ivor-Lewis	3	2	0	5.5×2cm	ESCC	Negative	0.7	Moderately	1
Male	O	30	20	None	Ivor-Lewis	3	0	0	5.8×1.3cm	ESCC	Negative	41.6	Poorly	0
Male	B	30	0	None	Ivor-Lewis	3	1	0	5.8×1.3cm	ESCC	Negative	0.5	Moderately	1
Male	A	40	0	None	Ivor-Lewis	3	0	0	5×1.2cm	ESCC	Negative	52.3	Moderately	0
Male	O	20	20	None	Ivor-Lewis	3	0	0	5×1.3cm	ESCC	Negative	6.6	Moderately	1
Male	B	40	40	None	Ivor-Lewis	4	1	0	5×1.5cm	ESCC	Negative	4.8	Moderately	0
Male	AB	40	40	None	Ivor-Lewis	3	1	0	5×1.5cm	ESCC	Negative	8.7	Moderately	1
Male	Unkonwn	26	26	None	Ivor-Lewis	3	0	0	5×1.5cm	ESCC	Negative	25.4	Moderately	1
Female	AB	30	0	None	Ivor-Lewis	3	3	0	5×1cm	ESCC	Negative	6.5	Moderately	0
Male	A	45	40	None	Ivor-Lewis	3	0	0	5×1cm	ESCC	Negative	7.1	Moderately	1
Male	A	20	20	None	Ivor-Lewis	2	2	0	5×1cm	ESCC	Negative	22.1	Moderately	1
Male	Unkonwn	40	40	None	Ivor-Lewis	2	1	0	5×1cm	ESCC	Negative	26.6	Moderately	1
Male	A	20	20	None	Ivor-Lewis	3	0	0	5×1cm	ESCC	Negative	37.7	Moderately	1
Male	O	30	30	None	Ivor-Lewis	3	2	0	5×2cm	ESCC	Negative	1.8	Moderately	0
Male	O	0	0	Brother&lung cancerBrother&bladder cancer	Ivor-Lewis	3	0	0	5×2cm	ESCC	Negative	9.5	Moderately	0
Male	B	0	0	Sister&esophagus cancer	Ivor-Lewis	3	0	0	5×2cm	ESCC	Negative	21.4	Moderately	1
Male	A	40	30	None	Ivor-Lewis	3	1	0	5×3.5cm	ESCC	Negative	22.6	Moderately	1
Male	A	30	0	None	Ivor-Lewis	3	3	0	5×3cm	ESCC	Negative	9.4	Moderately	0
Male	A	45	30	None	Ivor-Lewis	3	1	0	6.5×1.2cm	ESCC	Negative	22.3	Moderately	1
Male	B	0	30	None	Ivor-Lewis	3	1	0	6.5×1cm	ESCC	Negative	5.8	Moderately	0
Female	O	0	0	None	Ivor-Lewis	2a	1	0	6.5×2.5cm	ESCC	Negative	52.1	Moderately	0
Male	O	30	20	Father&lung cancer	Ivor-Lewis	2	0	0	6.5×2.5cm	ESCC	Negative	69.6	Moderately	0
Male	O	30	30	None	Ivor-Lewis	2	2	0	6.5×2cm	ESCC	Negative	19.6	Moderately	1
Male	O	20	20	None	Ivor-Lewis	3	0	0	6.5×4cm	ESCC	Negative	60.5	Poorly	0
Male	O	20	20	Mother&stomach cancer	Ivor-Lewis	3	1	0	6×1.2cm	ESCC	Negative	10	Moderately	1
Male	O	30	30	None	Ivor-Lewis	3	0	0	6×1.2cm	ESCC	Negative	19.9	Moderately	1
Male	A	40	20	None	Ivor-Lewis	4	1	0	6×1.3cm	ESCC	Negative	4.9	Moderately	0
Male	B	30	30	None	Ivor-Lewis	4	0	0	6×1.5cm	ESCC	Negative	0.8	Well	0
Male	B	10	10	Father&stomach cancer	Ivor-Lewis	3	0	0	6×1.5cm	ESCC	Negative	4.2	Well	0
Male	O	50	20	None	Ivor-Lewis	3	0	0	6×1cm	ESCC	Negative	8.1	Moderately	1
Male	B	10	0	None	Ivor-Lewis	3	3	0	6×1cm	ESCC	Negative	33.9	Moderately	1
Male	O	0	0	None	Ivor-Lewis	3	0	0	6×2.2cm	ESCC	Negative	7.9	Moderately	1
Male	A	1	4	None	Ivor-Lewis	3	3	0	6×3cm	ESCC	Negative	7.5	Moderately	0
Male	AB	30	30	None	Ivor-Lewis	3	2	0	7.5×0.7cm	ESCC	Negative	3.2	Well	0
Male	B	0	0	Mother&esophagus cancer	Ivor-Lewis	3	0	0	7.5×4cm	ESCC	Negative	6.6	Well	0
Male	AB	40	0	Father&stomach cancer	Ivor-Lewis	3	0	0	7×0.8cm	ESCC	Negative	1.9	Moderately	0
Male	B	20	40	None	Ivor-Lewis	3	1	0	7×0.8cm	ESCC	Negative	3.6	Moderately	0
Male	AB	40	0	None	Ivor-Lewis	Unknown	0	0	7×1.5cm	ESCC	Negative	58.9	Moderately	0
Male	O	0	0	None	Ivor-Lewis	3	0	0	7×1cm	ESCC	Negative	4.3	Moderately	1
Male	A	0	20	Father&esophagus cancer	Ivor-Lewis	3	0	0	7×2cm	ESCC	Negative	1.3	Moderately	0
Female	A	0	0	None	Ivor-Lewis	3	2	0	8×1.5cm	ESCC	Negative	2.7	Moderately	0
Male	B	50	50	None	Ivor-Lewis	4	1	0	8×1.6cm	ESCC	Negative	21.8	Moderately	1
Female	O	0	0	None	Ivor-Lewis	3	0	0	8×2.5cm	ESCC	Negative	34.5	Moderately	1
Male	B	50	30	None	Ivor-Lewis	3	0	0	8×2cm	ESCC	Negative	45.7	Poorly	0
Male	B	0	0	None	Ivor-Lewis	3	1	0	8×3.2cm	ESCC	Negative	3	Poorly	1
Male	O	10	0	None	Ivor-Lewis	3	2	0	9.5×1cm	ESCC	Negative	45.3	Moderately	1
Male	B	3	10	None	Ivor-Lewis	3	0	0	9×1.5cm	ESCC	Negative	12.3	Moderately	1
Male	A	40	30	None	Ivor-Lewis	3	0	0	9×1cm	ESCC	Negative	22.7	Poorly	1
Female	AB	0	0	Mother&esophagus cancer	Left thoracic	Unknown	Unknown	0	×cm	ESCC	Negative	64.7	Unknown	0
Male	A	0	0	None	Left thoracic	1a	0	0	×cm	ESCC	Negative	70.9	Unknown	0
Female	AB	0	0	None	Left thoracic	Tis	0	0	×cm	ESCC	Negative	4.2	Unknown	0
Male	B	0	20	None	Left thoracic	Tis	0	0	×cm	ESCC	Negative	46.1	Unknown	1
Female	B	0	0	None	Left thoracic	Tis	0	0	0.5×0.1cm	ESCC	Negative	42.5	Moderately	1
Female	O	0	0	Father&esophagus cancer	Left thoracic	1b	0	0	0.5×0.2cm	ESCC	Negative	8.4	Moderately	0
Male	A	50	40	Father&esophagus cancer	Left thoracic	Tis	0	0	0.5×0.4cm	ESCC	Negative	37.8	Unknown	1
Female	Unkonwn	0	0	None	Left thoracic	0	0	0	1.2×0.2cm	ESCC	Negative	11.8	Unknown	0
Male	A	30	30	Mother&pancreatic cancer	Left thoracic	1a	0	0	1.2×0.2cm	ESCC	Negative	56.2	Moderately	0
Male	B	0	10	None	Left thoracic	3	0	0	1.2×1.2cm	ESCC	Negative	76	Moderately	0
Male	B	0	40	None	Left thoracic	1b	0	0	1.5×0.2cm	ESCC	Negative	2.8	Poorly	0
Male	A	30	30	None	Left thoracic	2a	0	0	1.5×0.2cm	ESCC	Negative	65.4	Moderately	1
Female	O	0	0	None	Left thoracic	1b	0	0	1.5×0.4cm	ESCC	Negative	6.1	Moderately	0
Female	Unkonwn	0	0	None	Left thoracic	1b	0	0	1.5×0.4cm	ESCC	Negative	56.6	Moderately	0
Male	A	40	20	None	Left thoracic	2	0	0	1.5×0.5cm	ESCC	Negative	59	Moderately	1
Male	A	30	30	None	Left thoracic	3	2	0	1.5×0.8cm	ESCC	Negative	12.2	Poorly	0
Female	AB	0	0	None	Left thoracic	3	0	0	1.5×0.8cm	ESCC	Negative	40.8	Moderately	0
Male	O	40	50	None	Left thoracic	1b	0	0	1.5×0.8cm	ESCC	Negative	71.8	Moderately	0
Male	A	0	30	None	Left thoracic	2	1	0	1.5×1cm	ESCC	Negative	57.4	Moderately	1
Male	Unkonwn	30	30	None	Left thoracic	2a	2	0	1.5×1cm	ESCC	Negative	45.8	Moderately	0
Male	O	0	0	Father&esophagus cancerMother&lung cancer	Left thoracic	2a	0	0	1.8×0.2cm	ESCC	Negative	9.4	Unknown	1
Male	B	35	30	None	Left thoracic	1	0	0	1.8×0.3cm	ESCC	Negative	64.5	Moderately	0
Female	AB	0	0	None	Left thoracic	2	0	0	1.8×0.4cm	ESCC	Negative	72.5	Moderately	0
Male	O	10	0	None	Left thoracic	1	0	0	1.8×0.8cm	ESCC	Negative	41.3	Moderately	0
Male	Unkonwn	30	0	None	Left thoracic	2	1	0	1.8×1.2cm	ESCC	Negative	39.4	Moderately	1
Male	AB	45	45	None	Left thoracic	2a	0	0	1.8×1cm	ESCC	Negative	41.5	Poorly	0
Male	AB	37	35	Father&stomach cancer	Left thoracic	2	1	0	1.8×1cm	ESCC	Negative	44.2	Moderately	0
Male	B	30	40	Mother&cervical cancer	Left thoracic	2a	0	0	1×0.05cm	ESCC	Negative	40.7	Moderately	1
Male	O	10	20	None	Left thoracic	1	0	0	1×0.1cm	ESCC	Negative	64.8	Moderately	0
Male	O	50	20	None	Left thoracic	1a	0	0	1×0.3cm	ESCC	Negative	5.7	Unknown	0
Female	O	0	0	None	Left thoracic	1b	1	0	1×0.3cm	ESCC	Negative	61.1	Moderately	0
Male	Unkonwn	20	30	Father&prostate cancer	Left thoracic	1b	0	0	1×0.5cm	ESCC	Negative	1.2	Poorly	0
Male	Unkonwn	10	10	None	Left thoracic	2a	0	0	1×2cm	ESCC	Negative	26.7	Moderately	1
Male	Unkonwn	0	0	None	Left thoracic	2a	0	0	10×6cm	ESCC	Negative	61.6	Moderately	0
Male	B	20	20	None	Left thoracic	4	2	0	11.6×2.5cm	ESCC	Negative	1.7	Moderately	1
Male	B	30	30	None	Left thoracic	3	0	0	12×10cm	ESCC	Negative	9.2	Moderately	0
Male	Unkonwn	0	6	None	Left thoracic	3	2	0	15.5×1.5cm	ESCC	Negative	5.1	Moderately	1
Female	AB	0	0	None	Left thoracic	1b	0	0	2.2×1.5cm	ESCC	Negative	4.1	Poorly	0
Male	A	30	10	None	Left thoracic	1a	0	0	2.5×0.2cm	ESCC	Negative	6.9	Poorly	0
Male	B	40	30	None	Left thoracic	1a	0	0	2.5×0.4cm	ESCC	Negative	4	Moderately	0
Male	AB	30	30	Mother&rectal cancer	Left thoracic	1b	0	0	2.5×0.5cm	ESCC	Negative	1	Moderately	0
Male	AB	20	20	None	Left thoracic	2a	0	0	2.5×0.5cm	ESCC	Negative	53	Moderately	0
Male	A	10	10	Father&esophagus cancerMother&laryngocarcinorna	Left thoracic	2	0	0	2.5×0.8cm	ESCC	Negative	40.5	Moderately	0
Male	O	30	30	Father&lung cancer	Left thoracic	3	1	0	2.5×1.2cm	ESCC	Negative	3.4	Moderately	0
Female	B	0	0	Father&liver cancer	Left thoracic	2	0	0	2.5×1.2cm	ESCC	Negative	18.7	Moderately	1
Male	B	30	35	None	Left thoracic	2a	0	0	2.5×1.5cm	ESCC	Negative	1.5	Poorly	0
Male	O	30	20	None	Left thoracic	3	0	0	2.5×1.5cm	ESCC	Negative	65.1	Poorly	0
Male	AB	20	30	None	Left thoracic	3	1	0	2.5×1.5cm	ESCC	Negative	6.4	Moderately	0
Male	A	5	0	None	Left thoracic	3	0	0	2.5×1.5cm	ESCC	Negative	22.6	Moderately	1
Male	AB	5	20	None	Left thoracic	3	0	0	2.5×1.5cm	ESCC	Negative	52.4	Moderately	1
Male	B	20	20	Mother&stomach cancer	Left thoracic	3	0	0	2.5×1cm	ESCC	Negative	1.3	Moderately	0
Male	A	30	30	None	Left thoracic	2	0	0	2.5×1cm	ESCC	Negative	64.9	Moderately	0
Female	A	0	0	None	Left thoracic	3	0	0	2.5×1cm	ESCC	Negative	45.7	Moderately	0
Female	B	0	10	None	Left thoracic	2b	0	0	2.5×1cm	ESCC	Negative	58.4	Moderately	0
Female	A	0	0	None	Left thoracic	3	0	0	2.7×1.3cm	ESCC	Negative	40.4	Moderately	0
Male	A	40	0	None	Left thoracic	3	1	0	2.8×1.2cm	ESCC	Negative	52.3	Moderately	0
Male	Unkonwn	0	0	None	Left thoracic	2b	0	0	2.8×1.8cm	ESCC	Negative	52.3	Moderately	0
Male	Unkonwn	0	30	None	Left thoracic	1a	0	0	2×0.1cm	ESCC	Negative	54.1	Moderately	0
Male	A	30	30	None	Left thoracic	1b	0	0	2×0.5cm	ESCC	Negative	3.7	Poorly	0
Male	O	20	20	Mother&esophagus cancer	Left thoracic	2b	0	0	2×0.5cm	ESCC	Negative	2.7	Moderately	0
Male	O	20	0	None	Left thoracic	1b	0	0	2×0.5cm	ESCC	Negative	52.3	Moderately	0
Male	O	30	30	Father&esophagus cancer	Left thoracic	1	0	0	2×0.6cm	ESCC	Negative	9.9	Moderately	1
Male	A	0	12	None	Left thoracic	2a	1	0	2×0.7cm	ESCC	Negative	25.7	Moderately	1
Male	A	0	30	None	Left thoracic	3	0	0	2×0.8cm	ESCC	Negative	4.3	Moderately	0
Male	O	20	20	None	Left thoracic	2b	0	0	2×0.8cm	ESCC	Negative	58.6	Moderately	0
Male	B	30	30	None	Left thoracic	3	0	0	2×1.2cm	ESCC	Negative	9.6	Moderately	1
Female	O	0	0	None	Left thoracic	2b	0	0	2×1.4cm	ESCC	Negative	57.8	Moderately	1
Male	AB	30	30	None	Left thoracic	2	0	0	2×1.5cm	ESCC	Negative	64.9	Moderately	0
Male	B	0	10	None	Left thoracic	1	0	0	2×1cm	ESCC	Negative	44.1	Poorly	0
Male	O	40	40	None	Left thoracic	3	0	0	2×1cm	ESCC	Negative	1.5	Moderately	0
Male	A	20	20	None	Left thoracic	3	0	0	2×1cm	ESCC	Negative	41.1	Moderately	0
Male	O	20	30	None	Left thoracic	2	0	0	2×1cm	ESCC	Negative	73.8	Moderately	0
Male	B	17	30	None	Left thoracic	2	0	0	2×1cm	ESCC	Negative	41.3	Moderately	0
Male	B	20	0	None	Left thoracic	3	0	0	2×2cm	ESCC	Negative	24.9	Moderately	1
Male	O	40	40	None	Left thoracic	3	1	0	2×3.5cm	ESCC	Negative	1.9	Moderately	0
Male	O	30	30	None	Left thoracic	3	1	0	3.3×1.3cm	ESCC	Negative	3.9	Poorly	0
Male	AB	40	40	None	Left thoracic	3	2	0	3.4×2cm	ESCC	Negative	57.1	Moderately	0
Female	O	25	0	Mother&esophagus cancer	Left thoracic	3	2	0	3.5×0.5cm	ESCC	Negative	8	Moderately	1
Male	AB	30	30	None	Left thoracic	3	0	0	3.5×0.5cm	ESCC	Negative	75.9	Moderately	0
Male	A	40	40	None	Left thoracic	3	3	0	3.5×0.6cm	ESCC	Negative	20.6	Poorly	1
Male	O	15	15	None	Left thoracic	3	2	0	3.5×0.6cm	ESCC	Negative	60	Moderately	1
Male	B	40	0	None	Left thoracic	1b	0	0	3.5×0.8cm	ESCC	Negative	70	Moderately	0
Female	B	0	0	None	Left thoracic	3	0	0	3.5×0.8cm	ESCC	Negative	4.6	Poorly	0
Female	AB	0	0	None	Left thoracic	Unknown	2	0	3.5×0.8cm	ESCC	Negative	16.7	Moderately	1
Male	A	50	30	Father&lung cancer	Left thoracic	2	1	0	3.5×0.8cm	ESCC	Negative	26.1	Moderately	1
Male	O	30	0	None	Left thoracic	3	0	0	3.5×1.2cm	ESCC	Negative	53.3	Moderately	0
Male	B	40	30	None	Left thoracic	3	1	0	3.5×1.2cm	ESCC	Negative	70.4	Moderately	0
Male	A	40	40	None	Left thoracic	2b	0	0	3.5×1.2cm	ESCC	Negative	68.6	Moderately	1
Male	B	40	30	None	Left thoracic	3	0	0	3.5×1.2cm	ESCC	Negative	2.6	Moderately	1
Male	AB	20	20	None	Left thoracic	3	1	0	3.5×1.5cm	ESCC	Negative	2.4	Moderately	0
Female	B	0	0	None	Left thoracic	3	0	0	3.5×1.5cm	ESCC	Negative	8.5	Moderately	0
Male	B	40	40	None	Left thoracic	3	1	0	3.5×1.5cm	ESCC	Negative	40.9	Poorly	1
Male	A	30	30	Mother&esophagus cancer	Left thoracic	3	0	0	3.5×1.5cm	ESCC	Negative	35.7	Moderately	1
Male	Unkonwn	30	30	None	Left thoracic	3	1	0	3.5×1.5cm	ESCC	Negative	44.7	Moderately	1
Male	A	30	30	None	Left thoracic	3	1	0	3.5×1.5cm	ESCC	Negative	69.2	Moderately	0
Male	AB	20	0	Father&liver cancer	Left thoracic	3	0	0	3.5×1.8cm	ESCC	Negative	0.7	Well	1
Male	B	30	0	None	Left thoracic	3	0	0	3.5×1cm	ESCC	Negative	3.8	Poorly	0
Female	B	0	0	None	Left thoracic	2	0	0	3.5×1cm	ESCC	Negative	63.6	Poorly	1
Male	A	30	30	None	Left thoracic	3	0	0	3.5×1cm	ESCC	Negative	3.2	Moderately	0
Male	B	30	0	None	Left thoracic	3	1	0	3.5×1cm	ESCC	Negative	4.7	Moderately	0
Female	A	20	0	None	Left thoracic	3	0	0	3.5×1cm	ESCC	Negative	42.3	Moderately	1
Female	B	0	0	None	Left thoracic	3	0	0	3.5×2.5cm	ESCC	Negative	59.7	Moderately	0
Male	O	30	40	None	Left thoracic	3	1	0	3.5×2cm	ESCC	Negative	0.9	Moderately	0
Male	A	10	0	None	Left thoracic	3	0	0	3.5×2cm	ESCC	Negative	53.8	Moderately	0
Male	O	40	0	None	Left thoracic	3	0	0	3.5×2cm	ESCC	Negative	3.3	Moderately	0
Male	A	50	30	None	Left thoracic	1	0	0	3.5×2cm	ESCC	Negative	66	Moderately	0
Male	A	0	0	Father&esophagus cancer	Left thoracic	2	1	0	3.8×0.8cm	ESCC	Negative	24.3	Moderately	1
Female	B	0	0	Father&esophagus cancer	Left thoracic	1	0	0	3×0.5cm	ESCC	Negative	45.3	Well	1
Male	B	40	40	None	Left thoracic	3	0	0	3×0.5cm	ESCC	Negative	9.4	Moderately	1
Male	O	20	15	Father&lung cancer	Left thoracic	3	3	0	3×0.6cm	ESCC	Negative	55.6	Poorly	0
Male	A	20	0	None	Left thoracic	2a	0	0	3×0.6cm	ESCC	Negative	55.1	Moderately	0
Female	B	0	0	None	Left thoracic	3	2	0	3×0.8cm	ESCC	Negative	6.8	Unknown	1
Male	AB	40	0	None	Left thoracic	2a	0	0	3×1.2cm	ESCC	Negative	62.5	Moderately	0
Male	B	0	0	None	Left thoracic	3	0	0	3×1.3cm	ESCC	Negative	2.8	Moderately	0
Male	O	0	50	None	Left thoracic	3	1	0	3×1.5cm	ESCC	Negative	6.6	Moderately	0
Male	AB	20	0	None	Left thoracic	2a	0	0	3×1.5cm	ESCC	Negative	61.2	Moderately	0
Male	A	0	15	None	Left thoracic	3	0	0	3×1.5cm	ESCC	Negative	14.5	Moderately	1
Male	B	30	30	None	Left thoracic	3	0	0	3×1.5cm	ESCC	Negative	29.4	Moderately	1
Female	O	0	0	None	Left thoracic	2a	1	0	3×1.5cm	ESCC	Negative	40.3	Moderately	1
Female	O	30	30	None	Left thoracic	3	1	0	3×1.5cm	ESCC	Negative	8.9	Moderately	0
Male	Unkonwn	20	20	None	Left thoracic	3	2	0	3×1.5cm	ESCC	Negative	27.2	Moderately	1
Female	O	20	0	None	Left thoracic	2b	0	0	3×1cm	ESCC	Negative	59.2	Unknown	0
Male	A	30	20	None	Left thoracic	4	0	0	3×1cm	ESCC	Negative	5.2	Poorly	0
Male	B	30	30	None	Left thoracic	3	1	0	3×1cm	ESCC	Negative	51.1	Moderately	1
Male	AB	30	20	Mother&lung cancer	Left thoracic	3	0	0	3×1cm	ESCC	Negative	36.7	Moderately	1
Male	A	20	30	None	Left thoracic	3	0	0	3×1cm	ESCC	Negative	3.7	Poorly	0
Male	A	30	30	None	Left thoracic	3	2	0	3×1cm	ESCC	Negative	4.4	Moderately	0
Male	O	40	40	None	Left thoracic	3	2	0	3×1cm	ESCC	Negative	37.8	Moderately	1
Male	Unkonwn	25	25	None	Left thoracic	2a	1	0	3×1cm	ESCC	Negative	42.4	Moderately	1
Female	B	0	0	None	Left thoracic	3	0	0	3×2.5cm	ESCC	Negative	13.2	Moderately	1
Female	A	0	0	Mother&liver cancer	Left thoracic	3	1	0	3×2cm	ESCC	Negative	7.5	Moderately	0
Male	B	45	30	None	Left thoracic	3	0	0	3×2cm	ESCC	Negative	57.3	Moderately	0
Male	O	10	30	None	Left thoracic	2b	1	0	3×2cm	ESCC	Negative	62.3	Well	1
Female	B	0	0	None	Left thoracic	3	2	0	3×2cm	ESCC	Negative	3.9	Poorly	0
Male	AB	40	40	None	Left thoracic	3	0	0	3×2cm	ESCC	Negative	4.4	Well	0
Male	A	18	15	None	Left thoracic	2b	0	0	3×3cm	ESCC	Negative	52.2	Moderately	0
Male	B	20	0	None	Left thoracic	3	0	0	3×4cm	ESCC	Negative	22.4	Moderately	1
Female	O	0	0	None	Left thoracic	3	1	0	4.1×1.1cm	ESCC	Negative	76.5	Moderately	1
Male	AB	20	0	None	Left thoracic	2	0	0	4.5×0.5cm	ESCC	Negative	41.9	Moderately	1
Male	O	20	20	Mother&esophagus cancerBrother&esophagus cancer	Left thoracic	3	1	0	4.5×0.5cm	ESCC	Negative	5	Poorly	0
Male	B	30	40	None	Left thoracic	3	2	0	4.5×0.7cm	ESCC	Negative	11.5	Moderately	1
Male	A	30	30	Father&stomach cancer	Left thoracic	3	2	0	4.5×1.2cm	ESCC	Negative	4.2	Moderately	0
Male	O	20	20	None	Left thoracic	3	2	0	4.5×1.2cm	ESCC	Negative	17.8	Moderately	1
Male	O	0	0	None	Left thoracic	3	3	0	4.5×1.2cm	ESCC	Negative	2.4	Moderately	1
Male	B	13	13	None	Left thoracic	3	3	0	4.5×1.3cm	ESCC	Negative	5.3	Moderately	1
Male	O	40	20	None	Left thoracic	4	1	0	4.5×1.5cm	ESCC	Negative	42.7	Moderately	1
Male	Unkonwn	35	35	None	Left thoracic	3	2	0	4.5×1.5cm	ESCC	Negative	10.2	Moderately	1
Male	Unkonwn	20	20	None	Left thoracic	2a	1	0	4.5×1.5cm	ESCC	Negative	31.3	Moderately	1
Male	B	30	10	None	Left thoracic	3	0	0	4.5×1.7cm	ESCC	Negative	15.5	Moderately	1
Male	B	0	0	None	Left thoracic	3	3	0	4.5×1cm	ESCC	Negative	5.3	Moderately	0
Male	B	10	15	None	Left thoracic	3	0	0	4.5×1cm	ESCC	Negative	5.7	Moderately	0
Male	A	0	30	Father&esophagus cancer	Left thoracic	3	1	0	4.5×1cm	ESCC	Negative	4.3	Moderately	1
Male	A	40	40	None	Left thoracic	3	1	0	4.5×1cm	ESCC	Negative	22.7	Moderately	1
Female	O	0	0	None	Left thoracic	3	0	0	4.5×2cm	ESCC	Negative	42.6	Moderately	1
Male	B	45	50	None	Left thoracic	3	2	0	4.5×cm	ESCC	Negative	5.5	Poorly	0
Male	AB	30	20	None	Left thoracic	3	2	0	4.7×0.6cm	ESCC	Negative	65.4	Poorly	0
Male	A	20	20	Brother&liver cancer	Left thoracic	3	1	0	4.8×1cm	ESCC	Negative	2	Moderately	1
Male	A	30	20	None	Left thoracic	3	2	0	4×0.5cm	ESCC	Negative	5.7	Moderately	0
Male	O	40	20	None	Left thoracic	3	2	0	4×0.6cm	ESCC	Negative	4.6	Moderately	0
Female	AB	0	20	None	Left thoracic	3	0	0	4×0.8cm	ESCC	Negative	43.7	Moderately	0
Male	AB	10	0	None	Left thoracic	3	0	0	4×0.8cm	ESCC	Negative	44	Moderately	0
Female	Unkonwn	0	0	None	Left thoracic	3	2	0	4×0.8cm	ESCC	Negative	19.1	Moderately	1
Male	A	20	0	None	Left thoracic	2a	0	0	4×0.8cm	ESCC	Negative	19.5	Moderately	1
Male	A	20	20	None	Left thoracic	3	0	0	4×0.8cm	ESCC	Negative	0.9	Moderately	0
Male	B	50	0	None	Left thoracic	2b	0	0	4×1.2cm	ESCC	Negative	2.1	Moderately	0
Male	O	30	0	None	Left thoracic	3	0	0	4×1.2cm	ESCC	Negative	44.4	Moderately	1
Male	B	10	10	None	Left thoracic	3	0	0	4×1.2cm	ESCC	Negative	32.4	Moderately	1
Male	A	30	30	None	Left thoracic	3	2	0	4×1.3cm	ESCC	Negative	3.7	Moderately	0
Male	B	40	30	Brother&Cancer|Sister&Cancer	Left thoracic	3	0	0	4×1.3cm	ESCC	Negative	7.1	Moderately	0
Male	A	30	30	None	Left thoracic	3	0	0	4×1.3cm	ESCC	Negative	74.4	Moderately	0
Male	B	40	40	None	Left thoracic	3	2	0	4×1.3cm	ESCC	Negative	74.6	Moderately	0
Male	B	30	30	None	Left thoracic	3	0	0	4×1.4cm	ESCC	Negative	44.7	Moderately	1
Male	AB	40	0	None	Left thoracic	3	0	0	4×1.5cm	ESCC	Negative	72.8	Unknown	0
Male	A	10	20	None	Left thoracic	3	0	0	4×1.5cm	ESCC	Negative	5.9	Moderately	0
Male	O	0	0	None	Left thoracic	3	3	0	4×1.5cm	ESCC	Negative	8.7	Moderately	0
Male	O	30	20	None	Left thoracic	2b	0	0	4×1.5cm	ESCC	Negative	68.9	Moderately	0
Male	O	37	35	None	Left thoracic	3	0	0	4×1.5cm	ESCC	Negative	69.5	Moderately	1
Male	A	0	34	None	Left thoracic	3	2	0	4×1.5cm	ESCC	Negative	4.7	Poorly	1
Male	AB	15	20	None	Left thoracic	3	0	0	4×1.5cm	ESCC	Negative	5.4	Poorly	1
Male	O	40	40	None	Left thoracic	3	2	0	4×1.5cm	ESCC	Negative	14.8	Moderately	1
Female	B	10	0	None	Left thoracic	3	0	0	4×1.5cm	ESCC	Negative	16.4	Moderately	1
Male	AB	30	20	None	Left thoracic	3	3	0	4×1.5cm	ESCC	Negative	17.4	Moderately	1
Female	B	0	0	None	Left thoracic	3	0	0	4×1.5cm	ESCC	Negative	2.7	Moderately	1
Male	A	30	25	None	Left thoracic	3	0	0	4×1.5cm	ESCC	Negative	5.7	Moderately	1
Male	O	10	40	None	Left thoracic	3	0	0	4×1.5cm	ESCC	Negative	10.2	Moderately	1
Female	A	0	0	Father&lung cancer	Left thoracic	3	0	0	4×1.5cm	ESCC	Negative	38	Moderately	1
Female	AB	0	0	None	Left thoracic	2a	0	0	4×1.8cm	ESCC	Negative	16.4	Poorly	0
Male	B	40	30	None	Left thoracic	3	1	0	4×1.8cm	ESCC	Negative	59.9	Moderately	0
Male	B	30	30	None	Left thoracic	3	1	0	4×1cm	ESCC	Negative	3.1	Poorly	0
Male	A	40	40	Father&oral cancer	Left thoracic	4	0	0	4×1cm	ESCC	Negative	1.7	Moderately	0
Male	Unkonwn	30	20	None	Left thoracic	3	2	0	4×1cm	ESCC	Negative	51.4	Moderately	1
Male	AB	30	20	None	Left thoracic	3	2	0	4×1cm	ESCC	Negative	34.5	Moderately	1
Male	B	30	25	None	Left thoracic	3	2	0	4×1cm	ESCC	Negative	47.7	Moderately	1
Male	A	0	0	None	Left thoracic	3	2	0	4×1cm	ESCC	Negative	13.2	Moderately	1
Male	A	40	0	None	Left thoracic	3	0	0	4×2cm	ESCC	Negative	2.9	Unknown	0
Female	B	0	0	None	Left thoracic	3	0	0	4×2cm	ESCC	Negative	45.9	Moderately	1
Male	O	30	0	None	Left thoracic	2	2	0	4×2cm	ESCC	Negative	3.1	Poorly	1
Male	O	30	0	None	Left thoracic	3	0	0	4×2cm	ESCC	Negative	31.3	Moderately	1
Male	A	20	20	None	Left thoracic	3	2	0	4×2cm	ESCC	Negative	6.2	Poorly	0
Female	B	0	0	Mother&stomach cancer	Left thoracic	3	0	0	4×2cm	ESCC	Negative	62.8	Moderately	0
Female	A	0	0	None	Left thoracic	3	2	0	4×2cm	ESCC	Negative	56.4	Unknown	1
Male	A	40	40	None	Left thoracic	3	2	0	4×2cm	ESCC	Negative	11.9	Well	1
Male	A	0	0	None	Left thoracic	Unknown	Unknown	0	4×3cm	ESCC	Negative	0.3	Moderately	0
Male	B	10	0	None	Left thoracic	3	1	0	5.5×0.6cm	ESCC	Negative	1.6	Moderately	0
Male	B	0	0	None	Left thoracic	3	3	0	5.5×0.7cm	ESCC	Negative	29.1	Moderately	1
Male	A	20	20	None	Left thoracic	3	1	0	5.5×1.3cm	ESCC	Negative	29.3	Moderately	0
Male	A	30	0	None	Left thoracic	3	0	0	5.5×1.5cm	ESCC	Negative	36.3	Moderately	1
Male	B	30	10	None	Left thoracic	3	0	0	5.5×1cm	ESCC	Negative	1.8	Moderately	0
Male	AB	25	20	None	Left thoracic	3	2	0	5.5×1cm	ESCC	Negative	42.4	Moderately	1
Male	AB	0	20	None	Left thoracic	3	0	0	5.5×1cm	ESCC	Negative	3.1	Moderately	0
Male	B	40	40	Mother&stomach cancer	Left thoracic	4	0	0	5.5×1cm	ESCC	Negative	5	Moderately	0
Male	A	0	30	None	Left thoracic	2	0	0	5.5×1cm	ESCC	Negative	24.2	Moderately	1
Male	A	20	20	Father&stomach cancer	Left thoracic	3	1	0	5×0.6cm	ESCC	Negative	51.4	Moderately	1
Female	O	0	0	None	Left thoracic	2a	0	0	5×0.8cm	ESCC	Negative	8.7	Poorly	0
Male	A	20	40	None	Left thoracic	4	2	0	5×1.2cm	ESCC	Negative	1	Moderately	0
Male	A	20	30	None	Left thoracic	3	2	0	5×1.2cm	ESCC	Negative	27.7	Moderately	1
Female	B	0	0	None	Left thoracic	3	0	0	5×1.2cm	ESCC	Negative	4.3	Moderately	0
Male	A	0	0	None	Left thoracic	3	1	0	5×1.5cm	ESCC	Negative	8.6	Moderately	0
Male	A	45	30	None	Left thoracic	2b	0	0	5×1.5cm	ESCC	Negative	69.7	Moderately	0
Male	B	0	40	None	Left thoracic	3	2	0	5×1.5cm	ESCC	Negative	3	Moderately	1
Male	AB	0	40	None	Left thoracic	3	0	0	5×1.8cm	ESCC	Negative	9.5	Moderately	0
Male	AB	50	0	None	Left thoracic	3	0	0	5×1cm	ESCC	Negative	2.2	Poorly	0
Male	B	20	0	None	Left thoracic	3	2	0	5×1cm	ESCC	Negative	6.7	Moderately	0
Male	B	30	30	Father&esophagus cancerMother&esophagus cancer	Left thoracic	3	2	0	5×1cm	ESCC	Negative	41	Moderately	0
Male	B	40	40	None	Left thoracic	3	1	0	5×1cm	ESCC	Negative	66.5	Moderately	0
Male	AB	40	40	None	Left thoracic	4	0	0	5×1cm	ESCC	Negative	1.7	Moderately	0
Male	B	40	20	None	Left thoracic	3	0	0	5×1cm	ESCC	Negative	69.8	Moderately	0
Female	A	0	0	Mother&esophagus cancer	Left thoracic	1b	0	0	5×1cm	ESCC	Negative	46.3	Moderately	1
Female	B	0	0	None	Left thoracic	3	3	0	5×1cm	ESCC	Negative	6.5	Moderately	1
Male	A	30	0	None	Left thoracic	3	0	0	5×2.5cm	ESCC	Negative	73.1	Moderately	0
Female	B	0	0	None	Left thoracic	3	2	0	5×2cm	ESCC	Negative	21.2	Poorly	1
Male	A	30	30	None	Left thoracic	3	3	0	5×2cm	ESCC	Negative	18.2	Moderately	1
Male	B	30	30	None	Left thoracic	4	2	0	5×2cm	ESCC	Negative	29.4	Moderately	1
Male	B	0	0	None	Left thoracic	3	0	0	5×2cm	ESCC	Negative	5.8	Poorly	1
Male	B	30	30	None	Left thoracic	3	1	0	5×2cm	ESCC	Negative	44.9	Moderately	1
Male	A	0	0	None	Left thoracic	3	0	0	5×3cm	ESCC	Negative	6.3	Moderately	0
Male	Unkonwn	35	30	None	Left thoracic	3	0	0	5×3cm	ESCC	Negative	42.3	Moderately	1
Male	A	0	20	None	Left thoracic	3	3	0	5×3cm	ESCC	Negative	67.1	Moderately	1
Male	O	30	20	None	Left thoracic	3	1	0	5×4cm	ESCC	Negative	17.1	Moderately	1
Male	A	10	10	None	Left thoracic	3	0	0	5×6cm	ESCC	Negative	17.9	Moderately	1
Male	A	0	0	None	Left thoracic	2b	1	0	6.5×1.5cm	ESCC	Negative	3.6	Moderately	0
Male	O	0	0	None	Left thoracic	3	2	0	6.5×1.8cm	ESCC	Negative	5.1	Moderately	1
Male	B	0	0	None	Left thoracic	3	0	0	6.5×2.5cm	ESCC	Negative	39.8	Moderately	0
Male	A	0	20	None	Left thoracic	2b	0	0	6.5×2.5cm	ESCC	Negative	56	Moderately	1
Male	AB	0	0	None	Left thoracic	3	2	0	6.5×3.5cm	ESCC	Negative	2.8	Moderately	1
Male	AB	30	0	None	Left thoracic	3	3	0	6×0.8cm	ESCC	Negative	3.7	Moderately	0
Male	B	30	0	None	Left thoracic	3	1	0	6×0.8cm	ESCC	Negative	61.2	Moderately	1
Male	O	25	25	None	Left thoracic	2b	1	0	6×1.2cm	ESCC	Negative	1.6	Moderately	1
Male	Unkonwn	30	30	None	Left thoracic	3	1	0	6×1.6cm	ESCC	Negative	20.7	Moderately	1
Male	AB	30	20	None	Left thoracic	3	2	0	6×1cm	ESCC	Negative	3.6	Moderately	0
Female	B	0	0	Father&lung cancer	Left thoracic	3	1	0	6×1cm	ESCC	Negative	1.7	Poorly	0
Female	A	0	0	None	Left thoracic	3	0	0	6×1cm	ESCC	Negative	11.1	Moderately	1
Male	B	30	0	None	Left thoracic	3	0	0	6×2.3cm	ESCC	Negative	22.4	Moderately	1
Male	Unkonwn	0	0	None	Left thoracic	3	0	0	6×2cm	ESCC	Negative	15.7	Moderately	1
Male	O	0	20	None	Left thoracic	3	2	0	6×4.5cm	ESCC	Negative	7.1	Moderately	0
Male	B	50	0	None	Left thoracic	3	1	0	6×4.5cm	ESCC	Negative	5.1	Moderately	1
Male	AB	10	20	None	Left thoracic	3	2	0	6×5cm	ESCC	Negative	6.2	Poorly	0
Male	O	20	20	None	Left thoracic	1	0	0	6×5cm	ESCC	Negative	65.1	Moderately	0
Male	B	30	30	Father&stomach cancer	Left thoracic	3	0	0	7.5×1.3cm	ESCC	Negative	42.3	Moderately	1
Male	O	40	0	Mother&esophagus cancer	Left thoracic	3	3	0	7.5×1.5cm	ESCC	Negative	12.5	Poorly	1
Male	O	20	0	None	Left thoracic	3	0	0	7.5×3cm	ESCC	Negative	29.4	Moderately	1
Male	Unkonwn	0	40	None	Left thoracic	3	2	0	7×0.7cm	ESCC	Negative	3.6	Moderately	0
Female	O	3	0	None	Left thoracic	4	1	0	7×0.9cm	ESCC	Negative	3.6	Moderately	0
Male	A	30	30	None	Left thoracic	3	2	0	7×1.2cm	ESCC	Negative	24.7	Moderately	1
Male	B	0	20	None	Left thoracic	3	2	0	7×1.3cm	ESCC	Negative	6.1	Moderately	1
Male	A	40	40	None	Left thoracic	3	1	0	7×1cm	ESCC	Negative	4.2	Poorly	0
Male	A	32	15	None	Left thoracic	3	2	0	7×2.5cm	ESCC	Negative	15.5	Moderately	1
Male	B	0	0	None	Left thoracic	3	2	0	7×6cm	ESCC	Negative	8.3	Poorly	1
Male	O	30	0	Father&liver cancer	Left thoracic	4	2	0	8×1.5cm	ESCC	Negative	4.6	Moderately	0
Male	A	40	40	None	Left thoracic	4	0	0	8×1.5cm	ESCC	Negative	29.9	Moderately	1
Male	A	40	30	Father&stomach cancer	Left thoracic	3	1	0	8×1cm	ESCC	Negative	3.3	Poorly	0
Male	O	0	0	Father&esophagus cancer	Left thoracic	2	0	0	8×2cm	ESCC	Negative	1	Moderately	1
Male	O	15	20	None	Left thoracic	3	1	0	8×7cm	ESCC	Negative	9	Moderately	0
Male	A	20	20	None	Left thoracic	3	0	0	9×2cm	ESCC	Negative	4.6	Moderately	0
Female	Unkonwn	30	0	None	Left thoracic	1a	0	0	无×cm	ESCC	Negative	58.1	Well	0
Male	B	40	0	Brother&esophagus cancer	Minimally invasive	Tis	0	0	1×0.4cm	ESCC	Negative	7.3	Unknown	0
Male	O	10	20	Father&esophagus cancer	Minimally invasive	2a	0	0	2.3×0.5cm	ESCC	Negative	3.1	Moderately	0
Male	A	40	40	Father&esophagus cancer	Minimally invasive	1b	0	0	2.5×0.5cm	ESCC	Negative	1.6	Moderately	0
Female	B	20	20	Brother&colon cancer	Minimally invasive	2b	0	0	2.5×1.5cm	ESCC	Negative	16.7	Moderately	0
Female	O	0	0	Mother&liver cancer	Minimally invasive	3	0	0	2.5×1cm	ESCC	Negative	7.8	Moderately	0
Female	A	0	0	None	Minimally invasive	3	0	0	2×1.5cm	ESCC	Negative	20.1	Poorly	0
Male	A	0	0	None	Minimally invasive	3	0	0	3.5×1cm	ESCC	Negative	9.4	Moderately	0
Male	B	20	20	None	Minimally invasive	3	0	0	3×0.8cm	ESCC	Negative	1.7	Moderately	0
Male	O	0	0	None	Minimally invasive	2a	0	0	4.5×2cm	ESCC	Negative	2.3	Well	0
Male	B	20	20	Father&stomach cancer	Minimally invasive	3	1	0	4.5×3cm	ESCC	Negative	2.2	Moderately	0
Female	O	0	0	None	Minimally invasive	2b	0	0	4×1.2cm	ESCC	Negative	1	Moderately	0
Male	B	40	20	None	Minimally invasive	3	0	0	4×1.3cm	ESCC	Negative	3.7	Moderately	0
Female	A	0	0	None	Minimally invasive	2b	0	0	5.5×0.4cm	ESCC	Negative	1.2	Moderately	0
Male	B	30	0	Father&malignant lymphoma	Minimally invasive	3	1	0	5×0.7cm	ESCC	Negative	1.2	Poorly	0
Male	A	30	20	None	Minimally invasive	3	1	0	5×1.5cm	ESCC	Negative	6.7	Moderately	0
Male	A	20	0	None	Minimally invasive	2a	0	0	5×1cm	ESCC	Negative	1.1	Poorly	0
Male	A	50	0	None	Minimally invasive	4	0	0	6×1.5cm	ESCC	Negative	2.9	Poorly	0
Female	B	0	0	None	Three-field	1a	0	0	×cm	ESCC	Negative	45.8	Poorly	0
Male	O	20	0	None	Three-field	Tis	0	0	1.2×0.8cm	ESCC	Negative	12.1	Well	0
Female	O	0	0	None	Three-field	1	0	0	1.5×0.25cm	ESCC	Negative	69.9	Moderately	1
Male	A	0	0	None	Three-field	4		0	1×0.6cm	ESCC	Negative	11.4	Moderately	1
Male	Unkonwn	0	0	None	Three-field	1b	0	0	2.2×0.5cm	ESCC	Negative	60.4	Moderately	0
Female	A	0	0	None	Three-field	3	0	0	2.5×0.5cm	ESCC	Negative	66.2	Moderately	0
Male	B	30	0	None	Three-field	2b	2	0	2.5×0.6cm	ESCC	Negative	6.8	Moderately	1
Female	A	0	0	None	Three-field	3	0	0	2.5×1.2cm	ESCC	Negative	19.4	Moderately	1
Male	O	20	0	None	Three-field	2	0	0	2.5×1cm	ESCC	Negative	72.2	Moderately	1
Male	A	30	30	None	Three-field	1a	0	0	2×0.3cm	ESCC	Negative	52.4	Moderately	0
Male	A	0	0	None	Three-field	4	0	0	2×0.5cm	ESCC	Negative	0.5	Poorly	0
Male	B	30	30	None	Three-field	2a	3	0	2×0.7cm	ESCC	Negative	3.6	Moderately	0
Male	Unkonwn	0	0	None	Three-field	3	1	0	3.5×0.5cm	ESCC	Negative	6.9	Moderately	0
Male	B	30	30	None	Three-field	2a	1	0	3.5×0.5cm	ESCC	Negative	6.7	Moderately	1
Female	A	25	0	None	Three-field	3	0	0	3.5×1.5cm	ESCC	Negative	48.2	Moderately	1
Male	B	40	40	None	Three-field	3	0	0	3.5×1.5cm	ESCC	Negative	59.7	Moderately	1
Male	B	40	40	None	Three-field	3	0	0	3.5×1cm	ESCC	Negative	26.7	Moderately	1
Male	A	45	40	None	Three-field	2b	0	0	3.5×2.5cm	ESCC	Negative	68.8	Moderately	1
Male	O	36	36	None	Three-field	3	0	0	3×.5cm	ESCC	Negative	60.1	Moderately	1
Female	B	0	0	Father&stomach cancerMother&stomach cancer	Three-field	1	2	0	3×0.6cm	ESCC	Negative	12.8	Moderately	1
Male	A	40	0	None	Three-field	3	1	0	3×1.5cm	ESCC	Negative	27.1	Poorly	1
Female	A	0	0	None	Three-field	3	1	0	3×1.5cm	ESCC	Negative	43.1	Moderately	1
Male	B	40	10	None	Three-field	3	3	0	3×2cm	ESCC	Negative	19.4	Moderately	1
Male	B	36	36	Father&esophagus cancer	Three-field	3	0	0	4.2×0.5cm	ESCC	Negative	57.4	Moderately	1
Male	O	30	30	None	Three-field	3	1	0	4.5×0.8cm	ESCC	Negative	1.3	Moderately	0
Male	A	20	30	Father&lung cancer	Three-field	2	0	0	4.5×1cm	ESCC	Negative	75.6	Well	0
Male	B	30	0	None	Three-field	2b	2	0	4.5×2.3cm	ESCC	Negative	6.5	Unknown	1
Male	O	30	0	None	Three-field	1b	0	0	4×0.3cm	ESCC	Negative	5.3	Moderately	0
Male	B	40	40	None	Three-field	3	0	0	4×1.3cm	ESCC	Negative	22.8	Moderately	1
Female	A	0	0	None	Three-field	3	0	0	4×1cm	ESCC	Negative	24.9	Moderately	1
Female	B	40	0	None	Three-field	3	0	0	4×2cm	ESCC	Negative	66.1	Moderately	0
Male	A	40	20	None	Three-field	3	1	0	4×2cm	ESCC	Negative	23.6	Moderately	1
Male	Unkonwn	20	0	None	Three-field	3	0	0	5.5×0.8cm	ESCC	Negative	1.9	Moderately	1
Male	A	10	15	None	Three-field	3	0	0	5.5×1.5cm	ESCC	Negative	75.8	Moderately	0
Female	A	0	0	None	Three-field	3	0	0	5×0.8cm	ESCC	Negative	3.7	Moderately	0
Male	B	40	40	None	Three-field	3	0	0	5×0.9cm	ESCC	Negative	4.7	Moderately	1
Male	A	20	20	None	Three-field	3	0	0	5×1.2cm	ESCC	Negative	41	Moderately	1
Female	O	0	0	Father&esophagus cancer	Three-field	3	0	0	5×1.5cm	ESCC	Negative	21.9	Moderately	1
Male	Unkonwn	50	40	None	Three-field	3	0	0	5×2.2cm	ESCC	Negative	4.6	Moderately	0
Male	A	40	40	None	Three-field	3	0	0	6×1.2cm	ESCC	Negative	0.4	Moderately	1
Female	B	30	0	None	Three-field	3	1	0	6×1.5cm	ESCC	Negative	14	Moderately	1
Male	A	20	15	None	Three-field	3	0	0	６×１cm	ESCC	Negative	19.1	Moderately	1
Male	B	25	25	None	Three-field	3	0	0	7.5×1cm	ESCC	Negative	29.7	Moderately	1
Female	Unkonwn	0	0	None	Three-field	3	3	0	7.7×0.9cm	ESCC	Negative	56.8	Moderately	0
Male	A	30	30	None	Three-field	3	1	0	7×1cm	ESCC	Negative	8.4	Moderately	1
Male	AB	20	20	None	Three-field	3	1	0	8.5×1.5cm	ESCC	Negative	8.5	Moderately	1
Male	A	10	0	None	Three-field	2a	1	0	9×1cm	ESCC	Negative	7	Moderately	0
Male	O	25	20	None	Unknown	1	0	0	1.5×1cm	ESCC	Negative	23.9	Moderately	1
Male	A	30	20	None	Unknown	3	1	0	10×1.5cm	ESCC	Negative	71	Moderately	1
Male	O	30	30	None	Unknown	3	1	0	2.5×1.5cm	ESCC	Negative	13.7	Moderately	1
Male	O	30	0	None	Unknown	1	3	0	2×0.2cm	ESCC	Negative	43.6	Poorly	0
Male	B	15	15	None	Unknown	2b	0	0	2×1.5cm	ESCC	Negative	59.9	Moderately	1
Female	A	0	0	None	Unknown	3	1	0	3.5×1.5cm	ESCC	Negative	46.9	Moderately	1
Male	AB	30	20	None	Unknown	3	0	0	3×0.8cm	ESCC	Negative	0.9	Moderately	0
Female	AB	20	0	None	Unknown	3		0	4.5×0.8cm	ESCC	Negative	11.4	Moderately	1
Male	AB	30	20	None	Unknown	2b	0	0	4×1.5cm	ESCC	Negative	8.5	Moderately	1
Male	AB	40	15	None	Unknown	3	1	0	4×2.5cm	ESCC	Negative	3.5	Moderately	1
Male	B	40	40	None	Unknown	3	0	0	5×0.8cm	ESCC	Negative	71	Moderately	1
Female	B	20	15	None	Unknown	2b	0	0	5×1cm	ESCC	Negative	71.4	Moderately	1
Male	A	30	25	None	Unknown	4	1	0	5×4cm	ESCC	Negative	5.3	Moderately	1
Male	B	7	17	None	Unknown	2b	0	0	6.5×2cm	ESCC	Negative	7.6	Moderately	1
Male	A	50	50	Mother&esophagus cancer	Unknown	3	0	0	6×1cm	ESCC	Negative	79.8	Well	0
Male	A	20	20	None	Unknown	3	1	0	6×1cm	ESCC	Negative	3	Moderately	1
