# Supplementary material for: The prognostic value of tumor length to resectable esophageal squamous cell carcinoma: a retrospective study
Source: PubMed Central journal article supplement (PMC5289103; doi:10.7717/peerj.2943), 2017-01-31
Supplement: peerj-05-2943-s001.pdf [file peerj-05-2943-s001.pdf]

|              | Rho     | chisq | <i>p</i> |
|--------------|---------|-------|----------|
| T            | 0.0383  | 0.257 | 0.6119   |
| N            | -0.0617 | 0.65  | 0.4199   |
| Tumor length | -0.1335 | 3.488 | 0.0618   |
| GLOBAL       | NA      | 4.834 | 0.1844   |

Note: The significance level: 0.05
