# Supplementary material for: The prognostic value of tumor length to resectable esophageal squamous cell carcinoma: a retrospective study
Source: PubMed Central journal article supplement (PMC5289103; doi:10.7717/peerj.2943), 2017-01-31

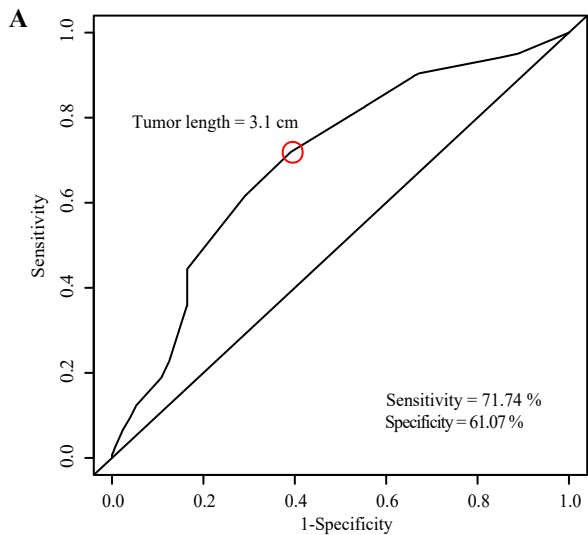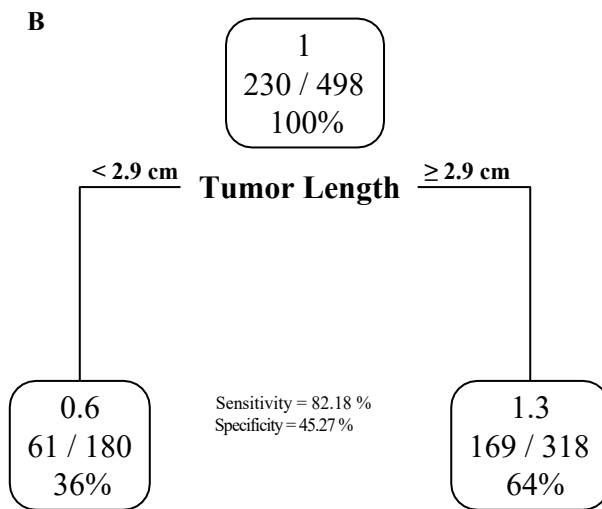

Supplement: peerj-05-2943-s003.pdf [file peerj-05-2943-s003.pdf]
